# Supplementary material
Source: HighWire-hosted journal article supplement (https://www.cmaj.ca/content/suppl/2016/03/03/cmaj.141593)
Supplement: 2.pdf [file 2.pdf]

**Traduction du résumé publié dans le *JAMC* (telle qu'elle a été fournie par les auteurs)**  
[La version anglaise est disponible à [www.cmaj.ca/lookup/doi/10.1503/cmaj.141593](http://www.cmaj.ca/lookup/doi/10.1503/cmaj.141593)]

## **Trouble du spectre de l'alcoolisation fœtale : lignes directrices pour un diagnostic tout au long de la vie**

Jocelynn L. Cook, PhD; Courtney R. Green, PhD; Christine M. Lilley, PhD; Sally M. Anderson, PhD; Mary Ellen Baldwin; Albert E. Chudley, MD; Julianne L. Conry, PhD; Nicole LeBlanc, MD; Christine A. Looock, MD; Jan Lutke; Bernadene F. Mallon, MTS; Audrey A. McFarlane, MBA; Valerie K. Temple, PhD; Ted Rosales, MD; pour le réseau de recherche CanFASD

Balados du *JAMC* : entrevue avec deux des auteurs [en anglais] à <https://soundcloud.com/cmajpodcasts/141593-guide>

**Intérêts concurrents** : Aucun déclaré.

Cet article a été révisé par des pairs.

**Correspondance** : Jocelynn Cook, [jcook@sogc.com](mailto:jcook@sogc.com)

### **POINTS CLÉS**

- « Trouble du spectre de l'alcoolisation fœtale » (TSAF) est un terme diagnostique qui décrit la constellation des effets de l'exposition prénatale à l'alcool.
- L'établissement d'un diagnostic de TSAF exige une équipe multidisciplinaire ainsi qu'une évaluation physique et neurodéveloppementale complexe.
- Le diagnostic de TSAF est essentiel à l'amélioration des issues pour les personnes et les familles touchées et comme contribution au counselling préalable à la grossesse, afin de prévenir de futurs cas.

Les conséquences de l'exposition prénatale à l'alcool ont été décrites pour la première fois il y a plus de 40 ans<sup>1,2</sup>. Le terme « syndrome d'alcoolisation fœtale » (SAF) a tout d'abord été utilisé pour décrire l'ensemble des anomalies congénitales causées par l'exposition prénatale à l'alcool (y compris le retard de croissance, les anomalies craniofaciales et les déficiences intellectuelles) qui ont des conséquences pendant toute la vie<sup>2</sup>. Le terme « ensemble des troubles causés par l'alcoolisation fœtale » (ETCAF) a ensuite été adopté pour décrire un éventail plus large de manifestations et de déficiences qui résultent de l'exposition intra-utérine à l'alcool. Conséquence des recherches réalisées depuis et des discussions entre des spécialistes du domaine, « trouble du spectre de l'alcoolisation fœtale » est maintenant retenu comme terme diagnostique pour

remplacer le « terme parapluie » « ETCAF ». On a évalué la prévalence à 1 personne sur 100, ce qui se traduit par plus de 330 000 personnes touchées au Canada<sup>3</sup>.

Le développement d'une capacité clinique à poser un diagnostic de TSAF reste difficile<sup>4</sup>, étant donné que celui-ci nécessite la réalisation d'un examen médical et d'une évaluation neurodéveloppementale par une équipe multidisciplinaire. En 2005, on a assisté à la publication de lignes directrices internationales fondées sur des preuves et élaborées en collaboration pour l'établissement de diagnostics liés à l'exposition prénatale à l'alcool<sup>5</sup>. Depuis, le domaine a évolué. Des preuves, une expertise et une expérience supplémentaires ont donné à penser qu'une révision s'imposait afin d'améliorer à la fois les diagnostics et les issues. En outre, des publications ont montré que des déficiences comportementales et fonctionnelles associées au TSAF découlaient de l'exposition à la consommation excessive d'alcool, même peu fréquente ou au début de la grossesse, ce qui souligne l'importance d'un counselling préalable à celle-ci. Des recherches précises sur des nourrissons, de jeunes enfants et des adultes souffrant de TSAF, ainsi qu'une meilleure connaissance du dysfonctionnement et de la nomenclature du développement neurologique ont suscité le processus de mise à jour et de révision. Une revue de la littérature et un vaste processus de consultation ont été entrepris pour réviser les lignes directrices de 2005 sur le diagnostic du TSAF<sup>5</sup>.

## **Portée**

Les recommandations se concentrent sur le processus diagnostique et s'adressent aux membres d'équipes diagnostiques multidisciplinaires canadiennes qui ont acquis l'expertise et l'expérience exigées par une formation spécialisée. Bien que les fournisseurs de soins primaires qui offrent des soins prénatals et donnent des conseils à des personnes envisageant une grossesse soient également susceptibles de bénéficier de ces recommandations, le processus diagnostique ne doit pas être effectué par une seule personne : il faut adopter une approche multidisciplinaire.

## **Méthodes**

### *Comité directeur des lignes directrices*

Un comité directeur de 14 membres a été constitué en septembre 2012. Les membres ont été sélectionnés par le réseau de recherche CanFASD en fonction de leur participation à l'élaboration des lignes directrices de diagnostic de 2005, de leur expertise en matière de TSAF et dans des domaines exigeant une attention particulière (p. ex., les lignes directrices de diagnostic pour les nourrissons, les jeunes enfants et les adultes; la nomenclature; les critères d'évaluation du développement neurologique). Le comité comprenait quatre psychologues, trois chercheurs, trois pédiatres, une travailleuse

sociale, une généticienne clinique, une coordonnatrice de clinique de TSAF et un parent de personnes vivant avec le TSAF.

### *Élaboration des lignes directrices*

Les lignes directrices ont été élaborées conformément au cadre de la Grille d'évaluation de la qualité des recommandations pour la pratique clinique (AGREE II)<sup>6</sup>, qui fournit une approche rigoureuse et factuelle. Le comité directeur a établi la portée des lignes directrices et conçu les questions clés. Ces tâches ont été accomplies lors des premières réunions. La portée et les questions ont, par la suite, été peaufinées et approuvées par consensus. La revue de la littérature a ensuite été accomplie par deux membres du comité (J.L.C. et C.R.G.) au moyen des combinaisons suivantes de termes de recherche MeSH (Medical Subject Headings) pour répondre aux questions clés : « fetal alcohol », « diagnosis\* », « infant\* », « prenatal alcohol » et « adult ». On a trouvé des comptes rendus pertinents publiés entre 2005 et septembre 2014 dans les bases de données suivantes : PubMed, PsychLIT, Medscape, MEDLINE, la base de données sur le financement des Instituts de recherche en santé du Canada et la Cochrane Library.

Pour compléter la revue de la littérature, le comité directeur a demandé la contribution de centres de diagnostic de partout au Canada. Trente-cinq cliniques ont répondu à un sondage en ligne afin de repérer les limites du processus diagnostique actuel. Le comité directeur a conçu et personnalisé le sondage en vue d'assurer la collecte de l'information nécessaire afin de répondre aux questions clés établies pour le présent projet. En outre, des consultations auprès d'experts canadiens et étrangers ont été réalisées par l'entremise de six groupes de discussion en personne avant la rédaction des recommandations. Trois des groupes de discussion ont réuni tous les membres du comité directeur, tandis que deux autres plus petits ont rassemblé deux membres du comité et un chercheur clinicien étranger spécialisé en TSAF.

Enfin, un groupe de discussion international constitué de 50 participants (dont un animateur et une adjointe administrative) a été organisé sur deux jours. Les participants ont été invités à formuler des commentaires et des conseils sur les recommandations en fonction de leur expertise en matière de TSAF du point de vue du diagnostic (plus précisément au sujet des nourrissons, des jeunes enfants et des adultes vivant avec le TSAF et de l'évaluation neurodéveloppementale). Il y avait 19 psychologues, 11 pédiatres, 5 chercheurs, 3 orthophonistes, 3 ergothérapeutes, 2 psychiatres, 1 généticien clinique, 1 directrice des politiques, 1 parent, 1 travailleuse sociale et 1 coordonnatrice de clinique.

Une fois les activités de revue de la littérature terminées, deux chercheuses d'expérience (J.L.C. et C.R.G.) ont rédigé des résumés et des rapports. Ces documents ont été distribués

à tous les membres du comité directeur pour examen, afin de servir à l'élaboration des recommandations. Après la rédaction de leur ébauche par le comité directeur, celles-ci ont été évaluées indépendamment par les deux mêmes chercheuses au moyen de la méthode Grading of Recommendations Assessment, Development and Evaluation (GRADE)<sup>7-9</sup> (encadré 1). Les membres du comité directeur ont examiné les recommandations et leur cotation trois fois avant la distribution d'une avant-dernière version à des experts canadiens et étrangers externes pour obtenir plus de commentaires. Tous les commentaires provenant de ces examens ont été réunis (par C.R.G.), puis renvoyés au comité directeur pour étude et une discussion plus poussée (lors de téléconférences), jusqu'à ce que chaque recommandation reflète le consensus du comité. En cas de divergence, les recommandations ont été peaufinées afin d'assurer un appui unanime. On trouvera d'autres renseignements sur l'élaboration des lignes directrices dans la version intégrale de celle-ci (disponible à [www.cmaj.ca/lookup/suppl/doi:10.1503/cmaj.141593/-/DC3](http://www.cmaj.ca/lookup/suppl/doi:10.1503/cmaj.141593/-/DC3)).

#### Encadré 1 : Cotation des recommandations<sup>7-9</sup>

##### Force de la recommandation

- *Forte* : Grande confiance dans l'équilibre entre les conséquences souhaitables et indésirables (c.-à-d. que les conséquences souhaitables l'emportent sur les conséquences indésirables ou vice-versa).
- *Faible\** : Moins de confiance dans l'équilibre entre les conséquences souhaitables et indésirables.

##### Niveau de qualité des données probantes

- *Élevée* : Nous avons une confiance élevée dans l'estimation de l'effet : celle-ci doit être très proche du véritable effet.
- *Modérée* : Nous avons une confiance modérée dans l'estimation de l'effet. Celle-ci est probablement proche du véritable effet, mais il est possible qu'elle soit nettement différente.
- *Faible* : Nous avons une confiance limitée dans l'estimation de l'effet. Celle-ci peut être nettement différente du véritable effet.
- *Très faible* : Nous avons très peu confiance dans l'estimation de l'effet. Il est probable que celle-ci soit nettement différente du véritable effet.

\* Les recommandations faibles ne doivent pas être mal interprétées comme étant le résultat de données scientifiques faibles ou comme faisant l'objet d'une incertitude.

## Recommandations

Les lignes directrices présentent des recommandations sur les aspects suivants : le dépistage, l'orientation vers des spécialistes et le soutien des femmes enceintes ou en postpartum et des personnes exposées au risque de TSAF; l'évaluation médicale, y compris les antécédents familiaux, les antécédents maternels liés à l'alcool, un examen médical et un diagnostic différentiel; les traits faciaux caractéristiques; l'évaluation neurodéveloppementale; les critères de nomenclature et de diagnostic; l'équipe diagnostique et les considérations particulières entourant l'évaluation neurodéveloppementale des nourrissons et des jeunes enfants.

Les recommandations sont présentées au tableau 1. Les précisions sur les données probantes qui étayent les recommandations se trouvent dans le texte intégral des lignes directrices, à l'annexe 1. La figure 1 présente un algorithme de diagnostic.

Les cliniciens devraient prendre en considération la question du diagnostic différentiel lorsqu'ils établissent un diagnostic de TSAF. Le diagnostic du TSAF est souvent complexe en raison de la multiplicité des facteurs de risque et des expositions défavorables qui contribuent substantiellement aux symptômes du patient. Aucun déficit neurodéveloppemental n'est considéré pathognomonique du TSAF ou spécifique à celui-ci.

## Mise en œuvre

Des programmes de formation sont en cours d'élaboration à travers le Canada, tout comme des présentations à des conférences nationales et internationales, afin de diffuser les lignes directrices révisées et actualisées. Des documents se concentreront sur l'importance du diagnostic du TSAF et seront destinés aux spécialistes de la santé et au grand public. En outre, le comité collabore avec des sociétés professionnelles (p. ex., la Société des obstétriciens et gynécologues du Canada) pour la conception de matériel et d'outils d'évaluation. Les lignes directrices seront réévaluées quand de nouvelles données probantes substantielles apparaîtront.

## Autres lignes directrices

Des méthodes diagnostiques semblables ont été adoptées à l'échelle internationale, mais elles diffèrent du point de vue de la spécificité des recommandations, des critères et des seuils cliniques<sup>13, 15-19</sup>. Il y a plusieurs différences importantes entre les présentes lignes directrices et d'autres. Toutefois, étant donné l'introduction de la nouvelle nomenclature, il est difficile de les comparer directement. En général, les lignes directrices de diagnostic diffèrent sur les points suivants : le nombre de traits faciaux caractéristiques exigé pour l'établissement du diagnostic; l'inclusion des retards de croissance comme critère

| Tableau 1 (1 <sup>re</sup> partie de 2) : Recommandations pour le diagnostic du trouble du spectre de l'alcoolisation fœtale (TSAF)*                                                                                                                                                                                                                                                                                                                                                                                                                                                                                                                                                                                                                                                                                                                                                                                                                                                                                                                                                                                                                                                                                                                                                                                                                                                                                                                                                                                                                                                   |                             |                                |
|----------------------------------------------------------------------------------------------------------------------------------------------------------------------------------------------------------------------------------------------------------------------------------------------------------------------------------------------------------------------------------------------------------------------------------------------------------------------------------------------------------------------------------------------------------------------------------------------------------------------------------------------------------------------------------------------------------------------------------------------------------------------------------------------------------------------------------------------------------------------------------------------------------------------------------------------------------------------------------------------------------------------------------------------------------------------------------------------------------------------------------------------------------------------------------------------------------------------------------------------------------------------------------------------------------------------------------------------------------------------------------------------------------------------------------------------------------------------------------------------------------------------------------------------------------------------------------------|-----------------------------|--------------------------------|
| Recommandation                                                                                                                                                                                                                                                                                                                                                                                                                                                                                                                                                                                                                                                                                                                                                                                                                                                                                                                                                                                                                                                                                                                                                                                                                                                                                                                                                                                                                                                                                                                                                                         | Force de la recommandation† | Qualité des données probantes‡ |
| <b>1.0 Dépistage, orientation vers des spécialistes et soutien</b>                                                                                                                                                                                                                                                                                                                                                                                                                                                                                                                                                                                                                                                                                                                                                                                                                                                                                                                                                                                                                                                                                                                                                                                                                                                                                                                                                                                                                                                                                                                     |                             |                                |
| 1.1 Toutes les femmes enceintes et celles venant d'accoucher devraient être soumises au dépistage de la consommation d'alcool avec des outils de mesure validés, et ce, par des fournisseurs de services qui ont reçu une formation adéquate sur leur utilisation <sup>10</sup> . Les femmes à risque de consommer beaucoup d'alcool devraient recevoir une brève intervention précoce (p. ex., du counselling et/ou d'autres services).                                                                                                                                                                                                                                                                                                                                                                                                                                                                                                                                                                                                                                                                                                                                                                                                                                                                                                                                                                                                                                                                                                                                               | Forte                       | Élevée                         |
| 1.2 Il faudrait diriger les personnes vers des spécialistes pour un diagnostic possible du TSAF chaque fois qu'il existe des preuves ou un soupçon d'exposition prénatale à l'alcool à des niveaux associés à des effets physiques ou sur le développement.                                                                                                                                                                                                                                                                                                                                                                                                                                                                                                                                                                                                                                                                                                                                                                                                                                                                                                                                                                                                                                                                                                                                                                                                                                                                                                                            | Forte                       | Modérée                        |
| 1.3 L'abstinence de l'alcool devrait être recommandée à toutes les femmes pendant la grossesse, afin d'assurer l'issue la plus sûre pour le fœtus. Un soutien adéquat devrait être fourni selon les indications.                                                                                                                                                                                                                                                                                                                                                                                                                                                                                                                                                                                                                                                                                                                                                                                                                                                                                                                                                                                                                                                                                                                                                                                                                                                                                                                                                                       | Forte                       | Élevée                         |
| <b>2.0 Évaluation médicale‡</b>                                                                                                                                                                                                                                                                                                                                                                                                                                                                                                                                                                                                                                                                                                                                                                                                                                                                                                                                                                                                                                                                                                                                                                                                                                                                                                                                                                                                                                                                                                                                                        |                             |                                |
| 2.1 Le processus diagnostique doit comprendre la compilation des antécédents sociaux et médicaux ainsi que la réalisation d'un examen physique complet.                                                                                                                                                                                                                                                                                                                                                                                                                                                                                                                                                                                                                                                                                                                                                                                                                                                                                                                                                                                                                                                                                                                                                                                                                                                                                                                                                                                                                                | Forte                       | Élevée                         |
| 2.2 La confirmation de l'exposition prénatale à l'alcool exige une documentation selon laquelle la mère biologique a consommé de l'alcool pendant la grossesse en cours et qui se fonde sur des observations cliniques fiables; une autodéclaration; les déclarations d'une source fiable; des dossiers médicaux faisant état de taux d'alcoolémie positifs; un traitement de l'alcoolisme; d'autres problèmes d'ordre social, juridique ou médical liés à la consommation d'alcool pendant la grossesse. La présence simultanée des trois traits faciaux possède une si grande spécificité relativement à l'exposition à l'alcool et au TSAF que la confirmation de cette exposition n'est pas exigée <sup>11</sup> . La présence de moins de trois traits faciaux n'a pas le même degré de spécificité et nécessite donc une autre confirmation.                                                                                                                                                                                                                                                                                                                                                                                                                                                                                                                                                                                                                                                                                                                                     | Forte                       | Modérée                        |
| <b>3.0 Traits faciaux caractéristiques</b>                                                                                                                                                                                                                                                                                                                                                                                                                                                                                                                                                                                                                                                                                                                                                                                                                                                                                                                                                                                                                                                                                                                                                                                                                                                                                                                                                                                                                                                                                                                                             |                             |                                |
| 3.1 Les trois traits faciaux caractéristiques suivants doivent être présents, étant donné leur spécificité relativement à l'exposition prénatale à l'alcool. <ul style="list-style-type: none"> <li>Longueur des fentes palpébrales <math>\geq 2</math> ET sous la moyenne (<math>&lt;</math> troisième percentile)</li> <li>Philtrum coté 4 ou 5 sur l'échelle de 5 points des Lip-Philtrum Guides de l'Université de Washington<sup>12</sup>.</li> <li>Lèvre supérieure cotée 4 ou 5 sur l'échelle de 5 points des Lip-Philtrum Guides de l'Université de Washington<sup>12</sup>.</li> </ul>                                                                                                                                                                                                                                                                                                                                                                                                                                                                                                                                                                                                                                                                                                                                                                                                                                                                                                                                                                                        | Forte                       | Élevée                         |
| <b>4.0 Évaluation neurodéveloppementale</b>                                                                                                                                                                                                                                                                                                                                                                                                                                                                                                                                                                                                                                                                                                                                                                                                                                                                                                                                                                                                                                                                                                                                                                                                                                                                                                                                                                                                                                                                                                                                            |                             |                                |
| 4.1 Un diagnostic de TSAF n'est posé qu'en présence de preuves de dysfonctionnement cérébral envahissant, qui se définit comme une déficience grave dans au moins trois des domaines suivants du développement neurologique : habiletés motrices; neuroanatomie/neurophysiologie; cognition; langage; rendement scolaire; mémoire; attention; fonctionnement exécutif, y compris le contrôle des impulsions et l'hyperactivité; régulation de l'affect; comportement adaptatif, aptitudes sociales ou communication sociale.                                                                                                                                                                                                                                                                                                                                                                                                                                                                                                                                                                                                                                                                                                                                                                                                                                                                                                                                                                                                                                                           | Forte                       | Élevée                         |
| 4.2 Une déficience grave se définit comme un score global ou un score dans un sous-domaine important qui, selon un outil normalisé de mesure du développement neurologique, est $\geq 2$ ET sous la moyenne, avec une marge de tolérance adéquate pour tenir compte de la possibilité d'erreur du test. Dans certains domaines, on peut prendre en considération les divergences importantes entre les scores des sous-domaines lorsque des différences d'une telle ampleur se produisent dans une proportion très faible de la population ( $\leq 3\%$ de la population). On peut aussi envisager une évaluation clinique avec des preuves convergentes de sources multiples et des critères diagnostiques du DSM-5 <sup>13</sup> pour certains troubles dans des domaines précis qui sont difficilement évalués par des tests normalisés. Par exemple, dans le domaine de la régulation de l'affect, les diagnostics suivants peuvent être considérés comme des indications de déficience grave : trouble dépressif majeur (avec épisodes récurrents), trouble dépressif persistant, trouble disruptif avec dysrégulation émotionnelle, trouble d'anxiété de séparation, mutisme sélectif, trouble d'anxiété sociale, trouble panique, agoraphobie ou trouble d'anxiété généralisée. On trouvera dans la version intégrale des lignes directrices une discussion par domaine de la façon dont ces critères sont opérationnalisés (disponible à <a href="http://www.cmaj.ca/lookup/suppl/doi:10.1503/cmaj.141593/-/DC3">www.cmaj.ca/lookup/suppl/doi:10.1503/cmaj.141593/-/DC3</a> ). | Forte                       | Modérée                        |
| <b>5.0 Critères de nomenclature et de diagnostic</b>                                                                                                                                                                                                                                                                                                                                                                                                                                                                                                                                                                                                                                                                                                                                                                                                                                                                                                                                                                                                                                                                                                                                                                                                                                                                                                                                                                                                                                                                                                                                   |                             |                                |
| 5.1 On peut établir un diagnostic de TSAF si une personne répond à l'un ou l'autre des deux ensembles de critères ci-dessous : <p>5.1.1 TSAF avec traits faciaux caractéristiques</p> <ul style="list-style-type: none"> <li>Présentation simultanée des trois traits faciaux caractéristiques (voir la section 3.0) ET</li> <li>Exposition prénatale à l'alcool confirmée ou inconnue ET</li> <li>Preuve de déficience dans au moins trois des domaines du développement neurologique identifiés (voir la section 4.0) ou, chez les nourrissons et les jeunes enfants, preuve de microcéphalie.</li> </ul> <p>OU</p> <p>5.1.2 TSAF sans traits faciaux caractéristiques</p> <ul style="list-style-type: none"> <li>Preuve de déficience dans au moins trois des domaines du développement neurologique identifiés (voir la section 4.0)</li> </ul> <p>ET</p> <ul style="list-style-type: none"> <li>Confirmation de l'exposition prénatale à l'alcool, avec estimation de la dose à un niveau connu pour son association avec les effets sur le développement neurologique.</li> </ul>                                                                                                                                                                                                                                                                                                                                                                                                                                                                                                | Forte                       | Élevée                         |

| Tableau 1 (2 <sup>e</sup> partie de 2) : Recommandations pour le diagnostic du trouble du spectre de l'alcoolisation fœtale (TSAF)*                                                                                                                                                                                                                                                                                                                                                                                                                                                                                                                                                                                                                                                                                                                                                                                                                                                                                                                                                                                                                                                                                                                                                                                                                                                                     |                             |                                |
|---------------------------------------------------------------------------------------------------------------------------------------------------------------------------------------------------------------------------------------------------------------------------------------------------------------------------------------------------------------------------------------------------------------------------------------------------------------------------------------------------------------------------------------------------------------------------------------------------------------------------------------------------------------------------------------------------------------------------------------------------------------------------------------------------------------------------------------------------------------------------------------------------------------------------------------------------------------------------------------------------------------------------------------------------------------------------------------------------------------------------------------------------------------------------------------------------------------------------------------------------------------------------------------------------------------------------------------------------------------------------------------------------------|-----------------------------|--------------------------------|
| Recommandation                                                                                                                                                                                                                                                                                                                                                                                                                                                                                                                                                                                                                                                                                                                                                                                                                                                                                                                                                                                                                                                                                                                                                                                                                                                                                                                                                                                          | Force de la recommandation† | Qualité des données probantes‡ |
| <p>5.2 À risque de trouble neurodéveloppemental et de TSAF associés à l'exposition prénatale à l'alcool</p> <p>5.2.1 Il ne s'agit pas d'un diagnostic. Il s'agit d'une désignation qui devrait être donnée aux personnes quand :</p> <ul style="list-style-type: none"> <li>• Il y a confirmation de l'exposition prénatale à l'alcool, avec estimation de la dose à un niveau connu pour son association avec les effets sur le développement neurologique;</li> <li>• Les critères des points 5.1.1 et 5.1.2 sur le système nerveux central ne sont pas remplis;</li> <li>• Il y a une certaine indication de trouble neurodéveloppemental avec une explication plausible du fait que les résultats de l'évaluation neurodéveloppementale n'ont pas rempli les critères de déficience substantielle (p. ex., le patient était trop jeune ou l'évaluation est incomplète).</li> </ul> <p>5.2.2 On peut également envisager cette désignation pour les personnes qui présentent les trois traits faciaux caractéristiques mentionnés au point 5.1.1, mais à l'égard desquelles on ne possède pas encore de documentation ou de preuve du respect du critère requis de la présence de déficiences dans trois domaines du développement neurologique ou plus d'une microcéphalie vraie. On ne doit jamais envisager cette désignation lorsqu'on confirme l'absence d'exposition prénatale à l'alcool.</p> |                             |                                |
| <b>6.0 L'équipe diagnostique</b>                                                                                                                                                                                                                                                                                                                                                                                                                                                                                                                                                                                                                                                                                                                                                                                                                                                                                                                                                                                                                                                                                                                                                                                                                                                                                                                                                                        |                             |                                |
| <p>6.1 Membres de l'équipe de base pendant toute la vie :</p> <p><i>Pour les nourrissons (&lt; 18 mois)</i></p> <ul style="list-style-type: none"> <li>• Pédiatre/médecin</li> <li>• Spécialiste du développement de l'enfant qui possède l'ensemble des compétences pour la réalisation d'évaluations physiques et fonctionnelles (p. ex., orthophoniste, physiothérapeute, ergothérapeute, psychologue clinicien).</li> </ul> <p><i>Pour les enfants d'âge préscolaire (de 18 mois à 5 ans)</i></p> <ul style="list-style-type: none"> <li>• Pédiatre/médecin</li> <li>• Ergothérapeute</li> <li>• Orthophoniste</li> <li>• Psychologue</li> </ul> <p><i>Pour les enfants d'âge scolaire (de 6 ans à l'âge de la majorité)</i></p> <ul style="list-style-type: none"> <li>• Pédiatre/médecin avec une expertise en TSAF et en diagnostic différentiel</li> <li>• Ergothérapeute</li> <li>• Orthophoniste</li> <li>• Psychologue</li> </ul> <p><i>Pour les adultes</i></p> <ul style="list-style-type: none"> <li>• Médecin</li> <li>• Psychologue</li> <li>• Orthophoniste/psychologue avec une expertise en évaluation du langage</li> </ul>                                                                                                                                                                                                                                                         | Forte                       | Élevée                         |
| <b>7.0 Considérations particulières relatives à l'évaluation neurodéveloppementale des nourrissons et des jeunes enfants</b>                                                                                                                                                                                                                                                                                                                                                                                                                                                                                                                                                                                                                                                                                                                                                                                                                                                                                                                                                                                                                                                                                                                                                                                                                                                                            |                             |                                |
| 7.1 Les nourrissons et les jeunes enfants qui présentent les trois traits faciaux caractéristiques et une microcéphalie devraient recevoir un diagnostic de « TSAF avec traits faciaux caractéristiques ». Ces enfants sont exposés à un risque élevé de trouble neurodéveloppemental <sup>11,14</sup> . On doit aussi les orienter vers un généticien clinique.                                                                                                                                                                                                                                                                                                                                                                                                                                                                                                                                                                                                                                                                                                                                                                                                                                                                                                                                                                                                                                        | Forte                       | Élevée                         |
| 7.2 On peut prononcer un diagnostic de « TSAF avec traits faciaux caractéristiques » à l'égard des nourrissons et des jeunes enfants qui possèdent les trois traits faciaux caractéristiques, s'ils subissent une évaluation neurodéveloppementale exhaustive et présentent des déficits dans trois domaines du cerveau ou plus. On peut prononcer un diagnostic de « TSAF sans traits faciaux caractéristiques » à l'égard des nourrissons et des jeunes enfants dont on a confirmé l'exposition prénatale à l'alcool, s'ils subissent une évaluation neurodéveloppementale exhaustive et présentent des déficits dans trois domaines du cerveau ou plus.                                                                                                                                                                                                                                                                                                                                                                                                                                                                                                                                                                                                                                                                                                                                              | Forte                       | Modérée                        |
| 7.3 Les nourrissons et les jeunes enfants dont on a confirmé l'exposition prénatale à l'alcool, mais qui ne respectent pas les critères du diagnostic de TSAF doivent être désignés comme étant « à risque de trouble neurodéveloppemental et de TSAF associés à l'exposition prénatale à l'alcool ». Ceux qui présentent les trois traits faciaux caractéristiques sans microcéphalie doivent être orientés vers un généticien clinique.                                                                                                                                                                                                                                                                                                                                                                                                                                                                                                                                                                                                                                                                                                                                                                                                                                                                                                                                                               | Forte                       | Élevée                         |
| 7.4 On doit recommander la réalisation d'une évaluation neurodéveloppementale complète, à un moment approprié à l'âge, de tous les nourrissons et les jeunes enfants dont on a confirmé l'exposition prénatale à l'alcool et/ou qui présentent les trois traits faciaux caractéristiques.                                                                                                                                                                                                                                                                                                                                                                                                                                                                                                                                                                                                                                                                                                                                                                                                                                                                                                                                                                                                                                                                                                               | Forte                       | Élevée                         |
| <b>8.0 Considérations particulières relatives à l'évaluation neurodéveloppementale des adolescents et des adultes</b>                                                                                                                                                                                                                                                                                                                                                                                                                                                                                                                                                                                                                                                                                                                                                                                                                                                                                                                                                                                                                                                                                                                                                                                                                                                                                   |                             |                                |
| 8.1 Les recommandations consécutives à l'évaluation doivent répondre aux besoins fondamentaux et immédiats du client, et l'aider à accéder aux ressources nécessaires.                                                                                                                                                                                                                                                                                                                                                                                                                                                                                                                                                                                                                                                                                                                                                                                                                                                                                                                                                                                                                                                                                                                                                                                                                                  | Forte                       | Modérée                        |
| <b>9.0 Prise en charge et suivi</b>                                                                                                                                                                                                                                                                                                                                                                                                                                                                                                                                                                                                                                                                                                                                                                                                                                                                                                                                                                                                                                                                                                                                                                                                                                                                                                                                                                     |                             |                                |
| 9.1 On doit fournir aux personnes atteintes du TSAF et à leurs soignants des liens vers des ressources susceptibles d'améliorer les issues. Cependant, on ne doit pas refuser une évaluation et un plan de prise en charge à une personne tout simplement à cause de la disponibilité limitée des services. Souvent, le diagnostic devient l'incitatif menant au développement de ressources.                                                                                                                                                                                                                                                                                                                                                                                                                                                                                                                                                                                                                                                                                                                                                                                                                                                                                                                                                                                                           | Forte                       | Faible                         |
| 9.2 Lorsque les jeunes adultes effectuent la transition vers la vie autonome, ils devront peut-être subir une réévaluation afin de détecter les changements dans les fonctions adaptatives et d'effectuer des ajustements ultérieurs à leur plan de prise en charge.                                                                                                                                                                                                                                                                                                                                                                                                                                                                                                                                                                                                                                                                                                                                                                                                                                                                                                                                                                                                                                                                                                                                    | Forte                       | Faible                         |
| <p>Remarques : DSM-5 = Manuel diagnostique et statistique des troubles mentaux. 5<sup>e</sup> édition; ET = écart-type.</p> <p>* La version intégrale des lignes directrices fournit des précisions sur les données probantes qui étayent ces recommandations (disponible à <a href="http://www.cmaj.ca/lookup/suppl/doi:10.1503/cmaj.141593/-/DC3">www.cmaj.ca/lookup/suppl/doi:10.1503/cmaj.141593/-/DC3</a>).</p> <p>† Au moyen de GRADE<sup>7-9</sup>. Voir l'encadré 1 pour les définitions.</p> <p>‡ Inclut les antécédents familiaux, les antécédents de consommation d'alcool de la mère, un examen physique et un diagnostic différentiel.</p>                                                                                                                                                                                                                                                                                                                                                                                                                                                                                                                                                                                                                                                                                                                                                 |                             |                                |

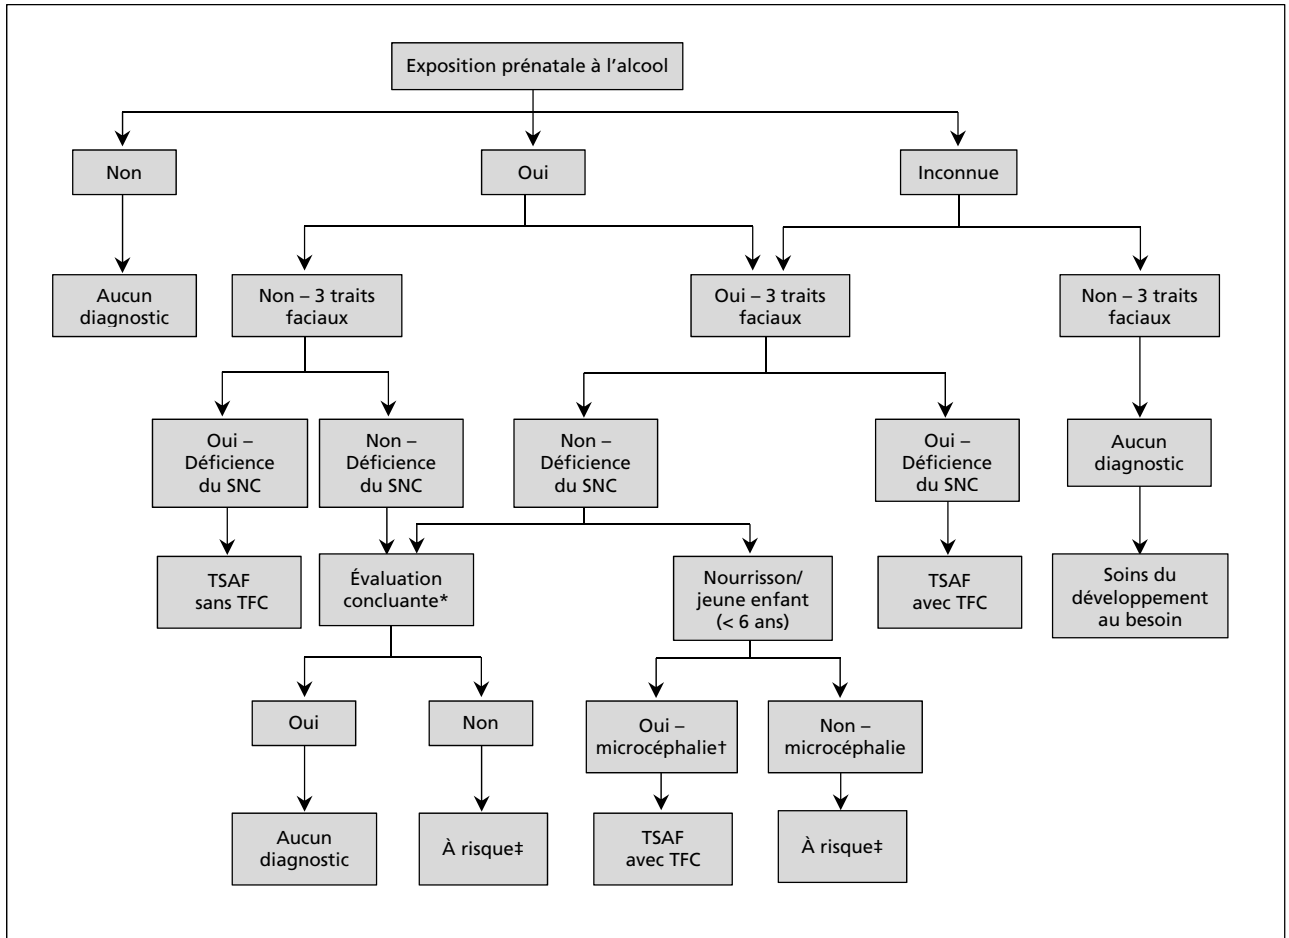

**Figure 1 : Algorithme de diagnostic du trouble du spectre de l'alcoolisation fœtale (TSAF). \*** Évaluation concluante = Le clinicien qui a réalisé l'évaluation neurodéveloppementale est satisfait que la séance rend réellement compte de la capacité de la personne et que les déficiences signalées ne sont pas le fait de circonstances atténuantes. Les évaluations peuvent ne pas être concluantes chez les enfants de moins de 6 ans, étant donné qu'on ne peut évaluer certains domaines avec confiance avant que la personne soit plus âgée ou étant donné la présence d'autres facteurs de confusion, comme un stress ou une maladie temporaire; voir le texte pour plus de renseignements. †La microcéphalie ne constitue pas la seule voie à emprunter pour l'établissement du diagnostic chez les nourrissons et les jeunes enfants. Ces personnes peuvent aussi recevoir d'autres diagnostics de TSAF, comme il est précisé ailleurs dans l'algorithme, si elles présentent une déficience substantielle dans trois domaines lors des tests neurodéveloppementaux. ‡À risque de trouble neurodéveloppemental et de TSAF associés à l'exposition prénatale à l'alcool. La désignation « à risque » inclut les situations où une évaluation neurodéveloppementale complète n'est pas concluante en raison de l'âge ou de facteurs situationnels. Par conséquent, le TSAF ne peut pas être le diagnostic. On recommande l'exercice d'un jugement clinique. Remarques : SNC = système nerveux central (déficience ou non dans  $\geq 3$  domaines du cerveau), TFC = traits faciaux caractéristiques.



diagnostique; le processus et les critères d'évaluation neurodéveloppementale; les méthodes et les mesures utilisées pour confirmer l'exposition prénatale à l'alcool (voir la version intégrale des lignes directrices pour une discussion plus approfondie). Des données récentes<sup>20</sup> révèlent que la plupart des cliniques canadiennes utilisent les lignes directrices de 2005<sup>5</sup>. L'encadré 2 indique les différences entre celles-ci et la présente mise à jour.

#### **Encadré 2 : Résumé de certaines mises à jour dans les présentes lignes directrices**

- L'utilisation de « trouble du spectre de l'alcoolisation fœtale » (TSAF) comme terme diagnostique.
- L'inclusion de considérations particulières pour le diagnostic du TSAF chez les nourrissons, les jeunes enfants et les adultes.
- L'élimination de la « croissance » comme critère diagnostique<sup>21</sup>.
- L'ajout de la catégorie « à risque » pour tenir compte des personnes qui ne remplissent pas les critères diagnostics, mais qui sont quand même exposées au risque de TSAF.
- La révision et le peaufinage de la liste des domaines du cerveau examinés lors de l'évaluation neurodéveloppementale. Voici une liste des changements et des ajouts apportés :
  - Le domaine « troubles neurologiques graves et légers (y compris au niveau de la fonction sensori-motrice) » a été renommé « habiletés motrices » et redéfini.
  - Le domaine « structure du cerveau » a été renommé « neuroanatomie/ neurophysiologie » et redéfini.
  - Le domaine « communication » a été renommé « langage ».
  - Le domaine « déficience de l'attention et hyperactivité » a été renommé « attention ».
  - Le domaine « régulation de l'affect » a été ajouté.
  - On a élargi et clarifié le domaine « fonctionnement exécutif ».

#### **Lacunes dans les connaissances**

Malgré 40 ans de recherches, il y a encore des lacunes dans les connaissances et les données probantes relatives au diagnostic du TSAF. Pour des raisons éthiques évidentes, il est impossible d'effectuer des études titrées sur la relation dose-effet qui porteraient sur l'exposition prénatale à l'alcool et la tératogénicité subséquente et qui donneraient sans doute des réponses plus définitives. Malgré cette limite apparente, des chercheurs et des cliniciens continuent de se pencher sur les effets de l'exposition prénatale à l'alcool au moyen d'une diversité de modèles et de méthodologies. Des preuves continuent d'émerger qui améliorent la compréhension du TSAF et la base de connaissances sur celui-ci. Par exemple, on est en train d'étudier des biomarqueurs diagnostiques, ainsi que des outils supplémentaires d'évaluation du dysfonctionnement du traitement sensoriel et

de l'intégration ainsi que des troubles du sommeil chez les personnes atteintes de TSAF<sup>22</sup>. D'autres recherches sont nécessaires pour déterminer l'association entre l'exposition prénatale à l'alcool et d'autres problèmes de santé mentale. Il faut analyser les bases de données renfermant des renseignements sur les diagnostics pour établir des corrélations entre les traits faciaux caractéristiques et les modèles de déficience neurodéveloppementale. Les recherches se poursuivent. Leurs constatations révéleront peut-être des approches originales qui seront susceptibles d'améliorer les technologies disponibles de dépistage, de diagnostic et de prise en charge.

## Conclusion

De nombreux documents attestent que les coûts de la technologie et des soins de santé augmentent rapidement et que les systèmes de soins de santé sont en train de réévaluer les programmes afin d'élaborer des pratiques et des modèles plus économiques et plus efficaces. Nous prévoyons que ces recommandations de pratiques exemplaires pour le diagnostic du TSAF, qui ont été mises à jour et reposent sur des preuves, amélioreront le processus actuel et qu'elles aboutiront à des soins plus efficaces et efficaces à l'intention des personnes atteintes, et ce, tout au long de leur vie. Bien que l'évaluation soit destinée à fournir de l'information sur les points forts des personnes ainsi que sur leurs défis et qu'elle vise à éclairer les interventions, elle n'est pas effectuée uniquement à des fins diagnostiques.

## Références

1. Lemoine P, Harousseau H, Borteyru JP, et al. Les enfants de parents alcooliques. *Ouest Med* 1968;21:476-82.
2. Jones KL, Smith DW, Ulleland CN, et al. Pattern of malformation in offspring of chronic alcoholic mothers. *Lancet* 1973;1:1267-71.
3. Population by year, by province and territory (number). Ottawa : Statistique Canada; 2014.
4. Clarren SK, Lutke J, Sherbuck M. The Canadian guidelines and the interdisciplinary clinical capacity of Canada to diagnose fetal alcohol spectrum disorder. *J Popul Ther Clin Pharmacol* 2011;18:e494-9.
5. Chudley AE, Conry J, Cook JL, et al. Fetal alcohol spectrum disorder: Canadian guidelines for diagnosis. *CMAJ* 2005;172(Suppl 5):S1-21.
6. Brouwers MC, Kho ME, Browman GP, et al. AGREE II: advancing guideline development, reporting and evaluation in health care. *CMAJ* 2010;182:E839-42.
7. Balshem H, Helfand M, Schunemann HJ, et al. GRADE guidelines: 3. Rating the quality of evidence. *J Clin Epidemiol* 2011; 64:401-6.
8. Andrews J, Guyatt G, Oxman AD, et al. GRADE guidelines: 14. Going from evidence to recommendations: the significance and presentation of recommendations. *J Clin Epidemiol* 2013; 66:719-25.
9. Andrews JC, Schunemann HJ, Oxman AD, et al. GRADE guidelines: 15. Going from evidence to recommendation-determinants of a recommendation's direction and strength. *J Clin Epidemiol* 2013; 66:726-35.
10. Looock C, Conry J, Cook JL, et al. Identifying fetal alcohol spectrum disorder in primary care. *CMAJ* 2005;172(3):628-30.
11. Astley SJ. Validation of the fetal alcohol spectrum disorder (FASD) 4-Digit Diagnostic Code. *J Popul Ther Clin Pharmacol* 2013;20:e416-67.
12. Astley SJ, Clarren SK. Measuring the facial phenotype of individuals with prenatal alcohol exposure: correlations with brain dysfunction. *Alcohol Alcohol* 2001;35(36):147-59.

13. American Psychiatric Association. *Diagnostic and statistical manual of mental disorders. Fifth edition*. Arlington (VA): American Psychiatric Publishing; 2013.
14. Astley SJ. Profile of the first 1400 patients receiving diagnostic evaluations for fetal alcohol spectrum disorder at the Washington State Fetal Alcohol Syndrome Diagnostic & Prevention Network. *J Popul Ther Clin Pharmacol* 2010;17:e132-64.
15. Stratton K, Howe C, Battaglia FC., dir. *Fetal alcohol syndrome: diagnosis, epidemiology, prevention, and treatment*. Washington: National Academy Press; 1996.
16. Hoyme HE, May PA, Kalberg WO, et al. A practical clinical approach to diagnosis of fetal alcohol spectrum disorders: clarification of the 1996 institute of medicine criteria. *Pediatrics* 2005;115:39-47.
17. Astley SJ, Clarren SK. Diagnosing the full spectrum of fetal alcohol-exposed individuals: introducing the 4-Digit Diagnostic Code. *Alcohol Alcohol* 2000;35:400-10.
18. *The ICD-10 classification of mental and behavioural disorders: clinical descriptions and diagnostic guidelines*. Genève: Organisation mondiale de la Santé, 1992.
19. *Fetal alcohol spectrum disorders: guidelines for referral and diagnosis*. Atlanta: US Centers for Disease Control and Prevention; 2004.
20. Clarren SK, Halliwell CI, Werk C, et al. Using a common form for consistent collection and reporting of FASD data from across Canada: a feasibility study. *J Popul Ther Clin Pharmacol* 2015;22:e211-27.
21. O'Leary CM, Nassar N, Kurinczuk JJ, et al. The effect of maternal alcohol consumption on fetal growth and preterm birth. *BJOG* 2009;116:390-400.
22. Memo L, Gnoato E, Caminiti S, et al. Fetal alcohol spectrum disorders and fetal alcohol syndrome: the state of the art and new diagnostic tools. *Early Hum Dev* 2013;89(Suppl 1):S40-3.

**Affiliations :** Réseau de recherche CanFASD (Cook, Green, Lutke); Société des obstétriciens et gynécologues du Canada (Cook, Green), Ottawa (Ont.); Département d'obstétrique et de gynécologie (Cook), Université d'Ottawa, Ottawa (Ont.); Département des sciences biomédicales et moléculaires (Green), Université Queen's, Kingston (Ont.); Sunny Hill Health Centre for Children (Lilley), Vancouver (C.-B.); National Institutes of Health (Anderson), Ottawa (Ont.); Fetal Alcohol Spectrum Disorders Clinic (Baldwin), Child Development Services, Alberta Children's Hospital, Calgary (Alb.); Département de pédiatrie (Chudley), Université du Manitoba, Winnipeg (Man.); Université de la Colombie-Britannique (Conroy [professeure émérite]), Vancouver (C.-B.); Département de pédiatrie (LeBlanc), Centre hospitalier universitaire Dr-Georges-L.-Dumont, Université de Moncton et Université de Sherbrooke, Moncton (N.-B.); Département de pédiatrie (Looke), Université de la Colombie-Britannique, Vancouver (C.-B.); Glenrose Rehabilitation Hospital (Mallon), Alberta Health Services, Edmonton (Alb.); Lakeland Centre for Fetal Alcohol Syndrome (McFarlane), Cold Lake (Alb.); Surrey Place Centre (Temple), Toronto (Ont.); Faculté de médecine (Rosales), Université Memorial de Terre-Neuve, St. John's (T.-N.-L.).

**Collaborateurs :** Tous les auteurs ont contribué substantiellement à l'élaboration des lignes directrices ainsi qu'à la rédaction et à la révision critique du manuscrit. Ils ont tous donné leur approbation finale à la version devant être publiée et accepté de se porter garants du travail.

**Financement :** Ce projet a été financé par l'Équipe TSAF de l'Agence de la santé publique du Canada et le réseau de recherche CanFASD

La traduction de ce document a été financée en partie par le gouvernement du Canada. The translation of this document was funded in part by the Government of Canada.

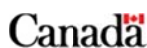

**Remerciements :** Les auteurs remercient les nombreuses personnes, y compris les cliniciens, qui ont aidé à élaborer, à examiner et à commenter les lignes directrices, en particulier les Drs Ilona Autti-Rämö, Heather Carmichael Olson, Sterling Clarren, Claire Coles, Ana Hanlon-Dearman, Kim Kerns, Gideon Koren, Mansfield Mela, Mary O'Connor, Sarah Mattson et Edward Riley.
